# Supplementary material
Source: Springer Nature journal article supplement (https://www.springermedizin.de/resource/supplementary/12958_2010_752_MOESM7_ESM.pdf/9568402)

A.

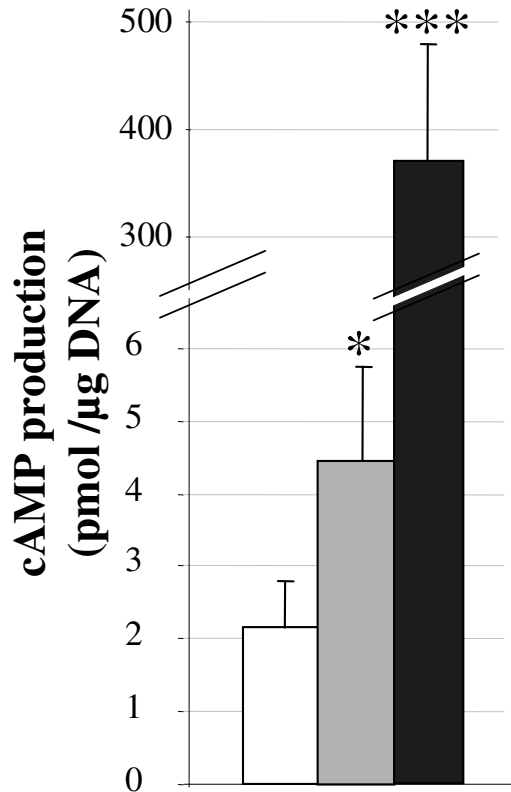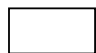

Control

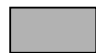

Adiponectin 250 ng/ml

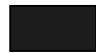

Forskolin 50  $\mu\text{M}$

B.

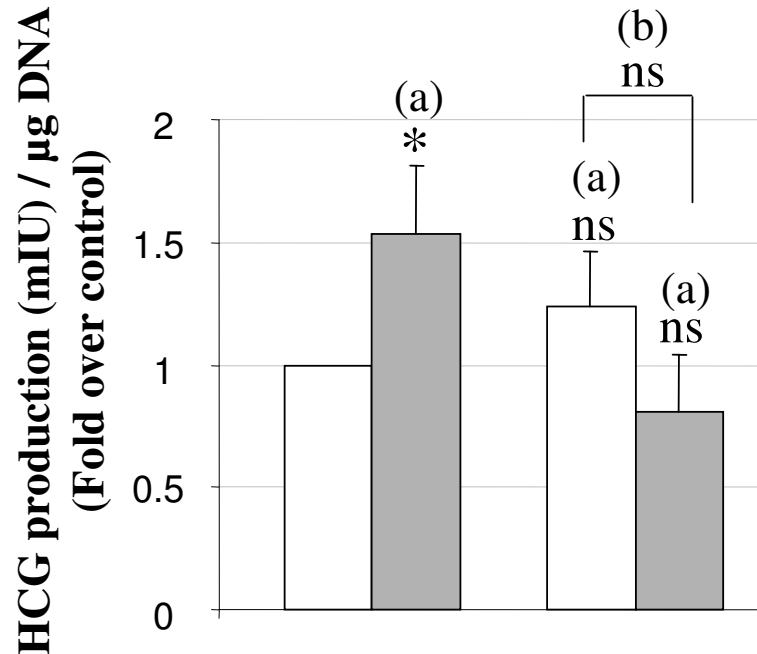

Adiponectin 250 ng/ml

-

+

-

+

H89 10  $\mu\text{M}$

-

-

+

+

Supplement: MOESM7 [file 9568402]
